# Supplementary material for: Tiny plastic, big trouble: how polystyrene nanoparticles impact DNA-damage repair deficient cervical cancer cells
Source: Royal Society of Chemistry journal article supplement (doi:10.1039/d5sm01095k), 2026-01-01
Supplement: d5sm01095k1.xlsx [file d5sm01095k1.xlsx]

## Sheet: SEM
		PS	FPS
		0.087	0.084
		0.083	0.056
		0.085	0.057
		0.083	0.068
		0.084	0.069
		0.084	0.041
		0.085	0.056
		0.084	0.068
		0.074	0.04
		0.066	0.075
		0.085	0.062
		0.081	0.044
		0.085	0.047
		0.088	0.067
		0.09	0.062
		0.089	0.078
		0.081	0.073
		0.086	0.077
		0.083	0.054
		0.091	0.039
		0.088	0.077
		0.08	0.05
		0.084	0.038
		0.088	0.048
		0.081	0.063
		0.083	0.057
		0.086	0.053
		0.089	0.063
		0.092	0.057
		0.085	0.072
		0.089	0.049
		0.075	0.066
		0.094	0.088
		0.086	0.057
		0.089	0.066
		0.092	0.082
		0.084	0.053
		0.088	0.061
		0.089	0.067
		0.085	0.071
		0.088	0.049
		0.085	0.067
		0.083	0.049
		0.087	0.062
		0.081	0.065
		0.093	0.06
		0.043	0.067
		0.087	0.069
		0.09	0.054
		0.086	0.054
		0.085	0.068
		0.086	0.05
		0.089	0.048
		0.083	0.053
		0.087	0.07
		0.088	0.067
		0.074	0.071
		0.083	0.052
		0.085	0.063
		0.089	0.056
		0.09	0.08
		0.085	0.055
		0.088	0.042
		0.093	0.043
		0.079	0.048
		0.088	0.071
		0.089	0.06
		0.086	0.058
		0.084	0.061
		0.087	0.038
		0.085	0.056
		0.09	0.061
		0.087	0.054
		0.083	0.06
		0.083	0.079
		0.088	0.074
		0.088	0.052
		0.072	0.066
		0.085	0.077
		0.081	0.072
		0.082	0.07
		0.088	0.045
		0.084	0.049
		0.09	0.1
		0.088	0.05
		0.088	0.049
		0.093	0.074
		0.093	0.076
		0.093	0.077
		0.093	0.081
		0.092	0.067
		0.085	0.057
		0.081	0.07
		0.082	0.061
		0.084	0.08
		0.085	0.081
		0.077	0.074
		0.083	0.072
		0.088	0.089
		0.089	0.046
		0.085	0.046
		0.094	0.082
		0.072	0.048
		0.091	0.055
		0.092	0.067
		0.095	0.085
		0.089	0.054
		0.074	0.048
		0.081	0.066
		0.085	0.057
		0.085	0.078
		0.08	0.07
		0.085	0.064
		0.084	0.075
		0.085	0.054
		0.091	0.076
		0.088	0.059
		0.085	0.047
		0.079	0.08
		0.09	0.069
		0.083	0.061
		0.085	0.076
		0.093	0.077
		0.09	0.079
		0.093	0.065
		0.092	0.041
		0.096	0.08
		0.091	0.06
		0.09	0.058
		0.093	0.068
		0.095	0.074
		0.087	0.07
		0.093	0.077
		0.089	0.046
		0.088	0.038
		0.088	0.067
		0.089	0.053
		0.084	0.076
		0.09	0.072
		0.088	0.073
		0.054	0.052
		0.094	0.06
		0.089	0.072
		0.092	0.057
		0.086	0.066
		0.088	0.076
		0.087	0.064
		0.094	0.077
		0.083	0.052
		0.09	0.085
		0.089	0.05
		0.086	0.069
		0.092	0.055
		0.097	0.072
		0.09	0.071
		0.085	0.042
		0.084	0.057
		0.088	0.08
		0.088	0.083
		0.088	0.075
		0.095	0.058
		0.089	0.05
		0.071	0.045
		0.083	0.072
		0.09	0.048
		0.089	0.048
		0.093	0.08
		0.092	0.074
		0.09	0.032
		0.095	0.085
		0.09	0.083
		0.095	0.052
		0.086	0.078
		0.086	0.08
		0.085	0.079
		0.076	0.072
		0.094	0.053
		0.092	0.057
		0.091	0.076
		0.088	0.072
		0.092	0.075
		0.089	0.06
		0.089	0.078
		0.089	0.083
		0.092	0.065
		0.089	0.065
		0.089	0.069
		0.083	0.076
		0.093	0.048
		0.083	0.073
		0.075	0.085
		0.085	0.065
		0.086	0.058
		0.1	0.053
		0.083	0.055
		0.088	0.093
		0.091	0.042
		0.092	0.091
		0.09	0.071
		0.09	0.06
		0.088	0.065
		0.086	0.056
		0.087	0.04
		0.091	0.039
		0.078	0.077
		0.09	0.053
		0.091	0.033
		0.086	0.051
		0.094	0.075
		0.088	0.048
		0.088	0.048
		0.091	0.076
		0.087	0.076
		0.085	0.065
		0.092	0.118
		0.083	0.059
		0.094	0.059
		0.083	0.062
		0.089	0.069
		0.093	0.075
		0.09	0.071
		0.088	0.056
		0.09	0.046
		0.086	0.044
		0.086	0.079
		0.087	0.068
		0.083	0.046
		0.09	0.072
		0.081	0.058
		0.093	0.058
		0.081	0.076
		0.089	0.075
		0.087	0.06
		0.089	0.053
		0.086	0.057
		0.084	0.071
		0.099	0.065
		0.086	0.059
		0.087	0.078
		0.092	0.059
		0.091	0.065
		0.088	0.08
		0.09	0.081
		0.09	0.065
		0.084	0.085
		0.085	0.04
		0.088	0.083
		0.084	0.067
		0.092	0.044
		0.086	0.077
		0.087	0.06
		0.088	0.07
		0.083	0.073
		0.079	0.072
		0.088	0.091
		0.091	0.073
		0.09	0.046
		0.093	0.068
		0.088	0.077
		0.09	0.074
		0.092	0.052
		0.085	0.045
		0.09	0.061
		0.092	0.062
		0.09	0.078
		0.087	0.046
		0.082	0.044
		0.093	0.047
		0.084	0.08
		0.089	0.047
		0.093	0.033
		0.083	0.054
		0.093	0.053
		0.091	0.069
		0.087	0.07
		0.076	0.051
		0.09	0.05
		0.088	0.067
		0.083	0.055
		0.077	0.076
		0.09	0.052
		0.082	0.034
		0.085	0.042
		0.088	0.091
		0.089	0.073
		0.089	0.073
		0.091	0.05
		0.09	0.091
		0.079	0.051
		0.085	0.054
		0.086	0.063
		0.084	0.064
		0.079	0.053
		0.092	0.071
		0.075	0.06
		0.075	0.055
		0.089	0.058
		0.092	0.044
		0.085	0.072
		0.088	0.082
		0.091	0.075
		0.085	0.05
		0.092	0.063
		0.09	0.086
		0.092	0.076
		0.088	0.067
		0.085	0.04
		0.092	0.063
		0.077	0.051
		0.086	0.081
		0.088	0.087
		0.084	0.043
		0.084	0.085
		0.086	0.064
		0.087	0.084
		0.084	0.053
		0.094	0.047
		0.092	0.075
		0.087	0.069
		0.086	0.059
		0.085	0.068
		0.09	0.054
		0.092	0.071
		0.089	0.076
		0.093	0.084
		0.093	0.054
		0.088	0.074
		0.084	0.043
		0.088	0.064
		0.086	0.086
		0.093	0.076
		0.092	0.053
		0.084	0.081
		0.092	0.081
		0.09	0.081
		0.095	0.04
		0.084	0.039
		0.069	0.052
		0.086	0.055
		0.087	0.05
		0.088	0.068
		0.081	0.049
		0.083	0.074
		0.1	0.064
		0.089	0.072
		0.088	0.057
		0.083	0.05
		0.09	0.05
		0.09	0.056
		0.088	0.111
		0.088	0.076
		0.095	0.069
		0.09	0.059
		0.087	0.065
		0.089	0.076
		0.085	0.067
		0.081	0.086
		0.084	0.062
		0.083	0.065
		0.095	0.073
		0.086	0.083
		0.095	0.046
		0.092	0.048
		0.085	0.06
		0.095	0.049
		0.083	0.076
		0.092	0.073
		0.088	0.056
		0.09	0.078
		0.092	0.046
		0.086	0.058
		0.088	0.048
		0.082	0.078
		0.086	0.05
		0.089	0.086
		0.082	0.044
		0.083	0.083
		0.088	0.086
		0.067	0.09
		0.087	0.078
		0.088	0.036
		0.09	0.082
		0.066	0.057
		0.08	0.087
		0.086	0.066
		0.089	0.064
		0.085	0.061
		0.05	0.066
		0.08	0.073
		0.092	0.07
		0.088	0.048
		0.084	0.061
		0.064	0.074
		0.085	0.072
		0.079	0.068
		0.093	0.048
		0.094	0.067
		0.087	0.052
		0.081	0.076
		0.09	0.062
		0.085	0.082
		0.085	0.085
		0.083	0.058
		0.093	0.053
		0.08	0.051
		0.078	0.069
		0.083	0.095
		0.09	0.085
		0.093	0.045
		0.083	0.058
		0.088	0.042
		0.079	0.072
		0.092	0.102
		0.091	0.09
		0.089	0.079
		0.085	0.071
		0.08	0.057
		0.093	0.066
		0.088	0.055
		0.085	0.049
		0.085	0.05
		0.067	0.073
		0.094	0.052
		0.086	0.051
		0.091	0.052
		0.088	0.069
		0.091	0.053
		0.089	0.077
		0.082	0.056
		0.086	0.083
		0.084	0.092
		0.083	0.074
		0.085	0.073
		0.083	0.067
		0.087	0.07
		0.082	0.075
		0.072	0.07
		0.08	0.072
		0.09	0.053
		0.083	0.076
		0.086	0.058
		0.088	0.072
		0.081	0.076
		0.087	0.082
		0.09	0.069
		0.095	0.06
		0.072	0.063
		0.09	0.062
		0.091	0.074
		0.091	0.082
		0.09	0.068
		0.09	0.065
		0.09	0.04
		0.086	0.045
		0.085	0.067
		0.086	0.064
		0.08	0.066
		0.088	0.067
		0.083	0.062
		0.086	0.067
		0.084	0.037
		0.093	0.074
		0.083	0.057
		0.092	0.073
		0.09	0.086
		0.097	0.068
		0.086	0.093
		0.09	0.06
		0.086	0.055
		0.088	0.064
		0.09	0.067
		0.091	0.069
		0.085	0.06
		0.081	0.052
		0.085	0.063
		0.08	0.052
		0.088	0.041
		0.091	0.045
		0.076	0.079
		0.092	0.066
		0.095	0.064
		0.09	0.064
		0.089	0.055
		0.048	0.049
		0.089	0.053
		0.063	0.061
		0.097	0.034
		0.089	0.065
		0.084	0.051
		0.068	0.054
		0.092	0.055
		0.089	0.056
		0.092	0.04
		0.093	0.058
		0.087	0.055
		0.088	0.066
		0.09	0.086
		0.087	0.069
		0.092	0.053
		0.093	0.062

## Sheet: DLS, Zeta Potential
	Z-average PS							Zeta Potential PS
Sonication Time	0 minutes	15 minutes	30 minutes	45 minutes	60 minutes	75 minutes	90 minutes	0 minutes	15 minutes	30 minutes	45 minutes	60 minutes	75 minutes	90 minutes
	116.8	532.9	128.8	110.3	114.4	113.2	110.4	-17.56	-15.95	-21.02	-20.64	-21.29	-15.69	-19.59
	116.4	209.8	132.7	111.6	116.8	116.5	115.7	-18.83	-16.92	-20.6	-21.12	-21.37	-17.65	-17.33
	116.1	201.6	130.6	109.3	114.6	118.7	118.1	-14.98	-16.37	-19.62	-18.67	-20.86	-17.79	-18.16
	123.4	109.3	110.1	104.5	100.9	105.5	103.7	-17.49	-8.976	-17.13	-6.707	-16.07	-18.13	-19.76
	123.7	113.4	114.4	112	109.4	109.3	113.5	-16.54	-9.464	-13.58	-7.829	-14.54	-18.11	-18.39
	125.3	114.8	124.9	118.2	112.9	113.7	114.5	-15.98	-8.836	-12.7	-5.702	-13.86	-16.32	-20.89
	124.4	126.4	108.3	133.7	193	103	103.8	-5.818	-8.64	-12.96	-16.29	-16.2	-9.252	-8.752
	121.1	126.4	107.3	121.3	167.7	104.8	106.7	-6.068	-10.87	-12.28	-15.26	-16.34	-8.878	-8.676
	126.6	118	109.1	134.1	172.7	105.6	109.8	-7.687	-10.14	-12.92	-14.9	-17.93	-8.56	-9.66
PS Concentration	1000 µg/mL	500 µg/mL	100 µg/mL	20 µg/mL	10 µg/mL	1 µg/mL		1000 µg/mL	500 µg/mL	100 µg/mL	20 µg/mL	10 µg/mL	1 µg/mL
	109.6	110.3	112.9	113.6	112.4	112.6		-41.33	-41.1	-34.26	-24.86	-22.87	-4.657
	107.3	109.9	113.7	112.9	113.5	113.5		-44.4	-36.94	-32.63	-25.62	-22.81	-5.335
	107.7	110.9	114.8	116.8	114.3	110.2		-43.16	-41.71	-32.92	-25.81	-23.48	-3.545
	233.7	113	111.7	114.2	111.1	113.9		-39.14	-36.04	-28.4	-24.11	-20.36	-1.434
	174.2	112.9	112.7	116.1	111.4	114.5		-41.25	-35.35	-32.33	-20.1	-22.78	-1.661
	209.4	112.9	116.8	116.5	114.2	119		-41.47	-37.8	-32.29	-21.56	-20.7	-1.029
	115.1	112.1	112.2	115.1	113.9	120.1		-42.77	-37.97	-30.44	-17.31	-19.18	-1.093
	116.3	113.4	112.7	115	115.1	117.9		-41.42	-36.72	-32.84	-18.3	-17.67	-0.5144
	117.5	114.5	114	116.7	117.8	118.2		-39.91	-34.28	-31.45	-19.14	-18.54	-0.5257
	FPS (SI)
	Hydrodynamic Diameter (nm)	Zeta Potential (mV)
	89	17.18
	87.41	18.01
	87.21	18.14
	90.96	13.96
	92.17	14.9
	89.45	15.84
	90.02	20.4
	89	17.28
	87.97	16.23

## Sheet: Cell Viability
Calcein AM
Concentration (μg/mL)	HeLa S3 WT							HeLa S3 MSH2 KO								HeLa S3 MLH1 KO
0	101.215	95.8741	166.962	84.5942	117.684	98.3412	91.5905	43.7386	84.9095	105.353	64.2138	114.372	120.25	111.469	97.5743	101.859	119.707	79.0404	113.869	101.787	66.5994	115.631	93.842	109.525
10	119.868	93.453	144.591	84.0138	119.546	96.3325	97.6905	88.6066	105.43	119.65	131.732	97.8092	114.696	123.069	107.313	112.523	154.136	114.572	136.136	93.7121	104.437	114.064	127.776	127.808
31	114.461	98.7305	124.197	137.118	68.4401	84.7964	80.5969	48.0969	129.431	123.664	118.269	101.524	102.595	117.997	102.54	111.118	134.21	86.5819	125.053	116.646	118.719	109.699	117.836	129.9
100	102.249	85.2303	162.901	138.755	137.792	122.495	119.102	43.8989	123.229	107.988	99.7492	106.803	81.9259	112.164	102.064	136.763	74.175	45.8196	115.695	106.303	103.461	114.879	108.727	117.038
316	72.7976	97.5865	165.021	119.184	119.105	111.713	132.265	92.8072	119.879	135.103	115.544	121.607	89.2372	96.2131	105.342	124.169	78.035	99.1406	98.0536	114.801	122.867	89.0247	50.2918	88.9612
1000	65.9751	109.742	153.03	141.037	65.1903	139.543	76.9778	109.618	140.444	130.548	127.01	113.308	98.9903	106.525	118.963	57.9857	79.9146	91.0213	103.891	91.687	124.981	101.698	37.8861	10.0544
1584	47.4537	25.1303	49.2919	60.9809	49.6999	115.955	143.106	72.548	86.9397	121.646	109.303	91.1738	112.228	113.032	86.7091	98.4247	49.3704	49.9055	91.1246	116.163	33.0387	151.058	93.2596	26.209
2511	87.1124	94.2929	34.0426	23.876	28.7229	36.1117	24.5052	24.8812	81.5982	87.4445	111.18	96.3698	128.445	123.45	124.008	80.2796	83.9664	29.2071	62.0464	54.9139	79.3776	119.137	139.465	109.979
3981	80.6057	126.813	69.9252	60.763	161.622	92.7882	19.7394	25.4599	93.0917	112.525	72.3844	76.1196	86.1651	114.967	141.792	72.3269	80.3825	61.6444	46.3823	30.9525	40.4181	87.932	3.50203	8.29031
6309	9.6782	20.618	12.9798	6.96139	21.0541	14.4476	10.5951	6.79285	25.9088	76.3265	56.676	37.7419	75.8638	94.1838	90.941	73.8106	1.82351	7.19658	36.2527	3.94413	12.8487	69.221	6.39692	1.3149
10000	3.3445	0.650307	1.52226	1.31096	2.14926	4.45643	1.63397	5.57802	2.83468	4.74614	3.94853	2.29712	2.07921	2.95173	1.0441	0.912582	3.28048	1.47764	2.89852	0.732452	2.93227	1.07965	0.426689	1.01081
MTT
Concentration (μg/mL)	HeLa S3 WT								HeLa S3 MSH2 KO								HeLa S3 MLH1 KO
0	79.7473	104.623	80.0133	119.92	99.8337	111.939	100.233	103.691	93.9047	121.102	104.204	85.2142	95.8358	123.516	94.2265	81.9956	90.3516	112.57	107.947	119.505	103.323	94.4614	89.3241	82.5173
0.01	101.297	93.7147	74.8254	106.884	113.136	100.499	104.224	98.1044	77.9722	110.803	104.204	96.6405	95.514	98.2498	118.367	84.2486	117.322	96.131	104.222	113.469	101.525	99.5987	87.9114	79.0496
0.032	96.6412	109.544	84.27	124.709	118.723	116.595	97.5723	109.411	93.4219	94.0656	104.043	95.6749	89.8813	91.6516	100.503	92.2953	101.14	98.5712	99.4702	114.882	101.654	91.2506	96.6447	81.1045
0.101	90.3891	117.925	87.4626	142.135	130.163	109.544	103.159	97.3063	76.041	86.5017	105.975	98.5717	91.3297	103.882	99.5373	79.0988	97.2869	100.112	96.5163	114.24	107.176	91.8928	91.379	81.7467
0.318	89.99	90.7882	100.233	117.792	128.301	100.233	100.366	87.3296	78.455	105.492	106.296	93.4219	87.6282	101.951	109.676	83.283	73.6555	92.278	80.7192	92.7918	96.3879	81.8751	88.0398	78.279
1.004	97.7053	106.884	99.3016	132.69	127.502	117.526	104.224	78.018	70.7302	114.021	91.8125	106.296	85.697	96.9624	112.251	77.3285	85.2143	90.8653	93.0486	98.4428	96.5163	81.8751	69.6741	69.6741
3.174	93.8477	109.278	104.091	125.507	121.782	111.008	111.141	105.022	67.6725	95.1921	107.262	81.8346	71.213	93.7437	100.664	73.788	84.1869	93.3055	86.3702	101.397	88.682	77.38	55.0329	62.7388
10.029	72.8301	104.091	92.2514	120.319	123.778	89.4579	93.1826	84.8021	58.3384	95.8358	110.481	97.6061	58.0165	87.9501	104.043	81.03	89.0673	88.682	88.1683	93.3055	86.7555	70.7016	86.3702	73.9124
31.029	72.298	97.4393	102.228	106.219	104.091	103.292	99.5677	96.5082	56.2462	97.2843	75.3973	92.1344	78.2941	86.3408	91.3297	57.5337	67.2339	77.8937	85.4712	97.6722	77.7653	75.4535	77.1231	57.3447
100.144	81.8756	53.2757	68.5733	78.55	76.6877	64.8487	79.4812	64.7157	49.3261	79.4206	85.697	87.6282	73.9489	68.1553	94.7093	62.3617	57.8584	67.8761	79.3065	88.5535	73.9124	67.2339	68.0045	59.2711
316.456	45.6934	72.298	80.6784	85.6003	82.8068	70.5687	75.2245	66.844	43.6934	73.9489	77.8113	91.1688	78.2941	87.3064	86.0189	64.6148	78.4074	77.5084	77.5084	77.5084	77.7653	66.977	54.776	43.8594
1000	49.019	71.1008	64.1836	85.4672	82.4077	72.431	75.7566	77.6189	78.2941	88.5938	81.8346	86.1798	60.4305	83.7658	89.3985	80.869	62.3535	66.3349	63.2525	84.4437	66.5918	67.2339	57.4731	44.8868

## Sheet: GSH GSSG
Concentration (μg/mL)	HeLa S3 WT			HeLa S3 MSH2 KO			HeLa S3 MLH1 KO
	Mean	SD	N	Mean	SD	N	Mean	SD	N
0	39.6679	5.29717	3	40.9585	6.12003	3	25.1928	8.78392	3
42.2	30.6101	12.9607	3	43.7215	6.5979	3	22.9487	8.30526	3
84.4	32.4096	7.8236	3	45.649	3.81822	3	33.6375	6.13861	3

## Sheet: Uptake
Cellular Uptake
Dose (μg/mL)	HeLa S3 WT								HeLa S3 MSH2 KO								HeLa S3 MLH1 KO
0	-1.55722	-2.20125	-2.16794	0.79682	-0.60894	-1.64161	-1.68602	-0.8399	-1.71934	-1.89256	-1.35957	-1.76153	-2.20347	-2.41222	-2.50328	-2.44998	0.057296	-1.51724	0.725755	-1.93475	-2.40556	-2.26343	-1.97251	-1.57276
15	-1.10862	-1.97695	-1.75487	-1.89922	-2.15905	-2.22124	-1.97917	-1.69935	-2.47885	-2.51882	-2.47663	-2.35892	-2.32561	-2.48995	-2.46552	-2.38779	-2.11908	-0.79105	-1.81483	-0.93318	-0.93096	-1.91477	-1.85258	-1.80151
30	-1.98805	-1.53723	-1.37289	1.00335	-1.77264	-2.01692	-1.21966	-1.3307	-2.3567	-2.37669	-2.3456	-2.41	-2.34116	-2.47663	-2.37003	-2.43887	-1.63717	-0.72442	-1.52169	-0.96205	-1.37733	-1.97695	-1.89256	-1.94808
50	-1.74821	-1.20189	3.98366	-0.79105	-0.38686	-1.92143	-1.82816	-2.11464	-2.36337	-2.5055	-2.30118	-2.46108	-2.35892	-0.27138	-2.15239	-2.23012	-1.39066	-1.25519	-1.38178	-1.18857	-1.29739	-2.02803	-2.09909	-0.92429
75	-1.58165	-1.10862	-1.11306	-0.11815	-1.77264	0.750183	0.719092	-1.74821	-2.21457	-2.12796	-2.24344	-2.20569	-2.51438	-2.55657	-2.42333	-1.31293	-1.21744	-1.10196	-1.83482	-2.0569	-1.56388	-1.58609	-1.1819	-1.97473
100	0.214973	1.78507	-1.62828	-1.54611	-1.2352	-1.14859	-1.45506	-1.75709	-0.62893	-2.28786	-2.08577	-1.94142	-2.12574	-1.72156	-2.17016	-2.34782	-0.8821	-1.64605	-0.7644	-1.80151	-1.50392	-2.31673	-0.95316	-1.3418
250	12.1162	4.91639	3.78156	-0.32024	14.2482	49.7741	-2.25899	0.055076	61.9219	-1.22854	-1.59053	0.759066	0.850119	-0.6156	-2.03913	0.756846	4.96525	2.55569	2.50905	4.78314	5.82247	4.0636	-0.61782	0.261609
500	1.4786	-0.30691	7.05279	18.8585	17.1374	33.0849	-0.40685	4.72096	1.65404	1.42752	-0.13591	1.1788	0.945613	4.82311	1.38755	102.389	1.14326	23.0447	0.121699	9.1581	14.7434	11.5277	6.57976	7.17493
750	57.2316	20.2687	2.72225	39.1876	42.8231	10.8637	2.32694	5.14957	3.89038	0.872327	-0.08928	18.3611	1.50081	20.4619	14.0039	20.1088	20.0022	11.7897	14.488	14.0105	6.97728	10.6149	44.3221	11.923
1000	87.8763	157.738	31.879	112.147	16.4712	40.4624	34.2575	24.3061	44.2955	-0.37576	10.1352	10.3551	15.1898	9.10258	6.69968	29.1319	12.0629	35.2924	10.4151	54.611	21.2436	43.9934	60.2407	13.1489
1500	3.90815	8.82498	17.9724	37.9018	47.7022	10.6816	33.4025	1.04999	66.0548	18.2034	94.13	57.3959	316.38	25.7718	15.8293	43.5182	11.8697	9.91761	11.31	15.1143	2.23811	9.23583	37.1689	7.74345
2000	12.5182	60.4872	90.117	107.215	80.8053	81.225	105.023	74.7358	99.0513	23.2579	43.074	48.113	38.2127	61.4066	70.4808	86.1862	12.0473	28.5945	10.2974	26.005	29.1674	17.6748	83.1193	33.0849
